# Supplementary material for: Heteroatom-Doped Hierarchically Porous Biochar for Supercapacitor Application and Phenol Pollutant Remediation
Source: MDPI journal article supplement (doi:10.3390/nano12152586), 2022-07-28
Supplement: s1 [file s1]

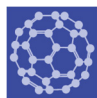

Supplementary material

# Heteroatom-Doped Hierarchically Porous Biochar for Supercapacitor Application and Phenol Pollutant Remediation

Diyong Tang<sup>1,\*</sup>, Li Lu<sup>1</sup>, Zhipeng Luo<sup>1</sup>, Baokun Yang<sup>1</sup>, Jun Ke<sup>2</sup>, Weidong Lei<sup>1</sup>, Hongran Zhen<sup>1</sup>, Yuan Zhuang<sup>3</sup>, Jie Sun<sup>1</sup>, Ke Chen<sup>1</sup> and Jie Sun<sup>1</sup>

- <sup>1</sup> Key Laboratory of Resources Conversion and Pollution Control of the State Ethnic Affairs Commission, College of Resources and Environmental Science, South-Central Minzu University, Wuhan 430074, China; 2021110590@mail.scuec.edu.cn (L.L.); 2020120750@mail.scuec.edu.cn (Z.L.); 2020110555@mail.scuec.edu.cn (B.Y.); 2021120875@mail.scuec.edu.cn (W.L.); 202021241174@mail.scuec.edu.cn (H.Z.); 3047207@mail.scuec.edu.cn (J.S.); kechen@mail.scuec.edu.cn (K.C.); jetsun@mail.scuec.edu.cn (J.S.)
- <sup>2</sup> School of Chemistry and Environmental Engineering, Wuhan Institute of Technology, Wuhan 430073, China; jke@wit.edu.cn
- <sup>3</sup> Experimental Teaching and Engineering Training Center, South-Central Minzu University, Wuhan 430074, China; 8800319@mail.scuec.edu.cn
- \* Correspondence: tangdy076@mail.scuec.edu.cn

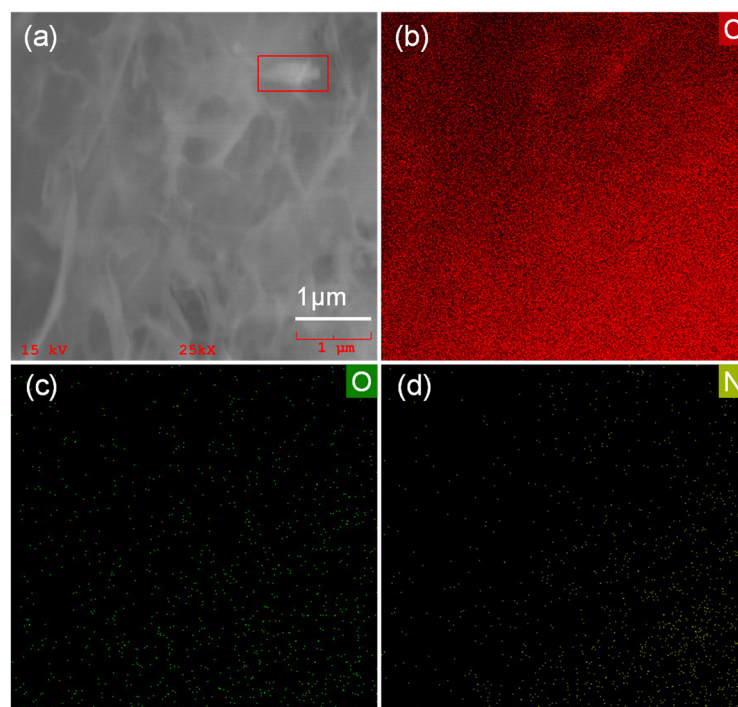

Figure S1. EDX elemental mapping images of BC-24.

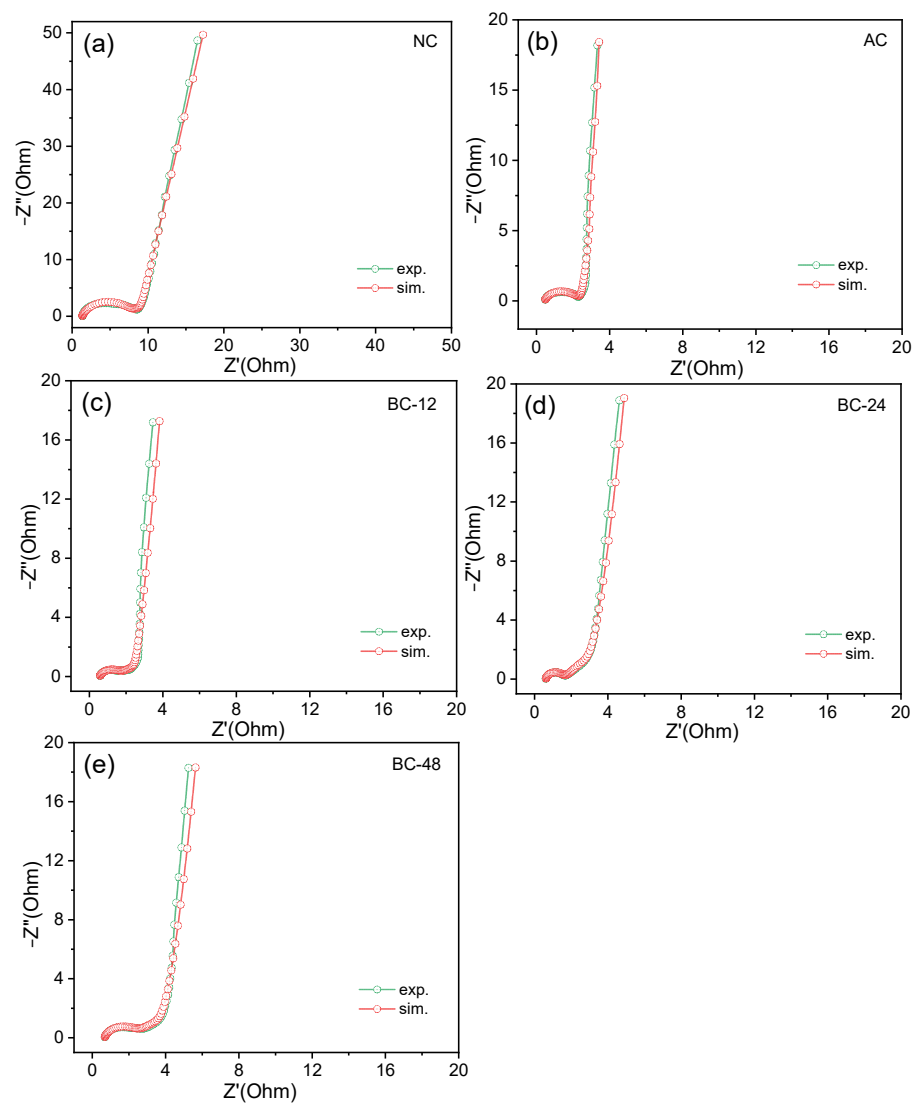

**Figure S2.** Experimental and simulated Nyquist plots for the indicated electrodes.

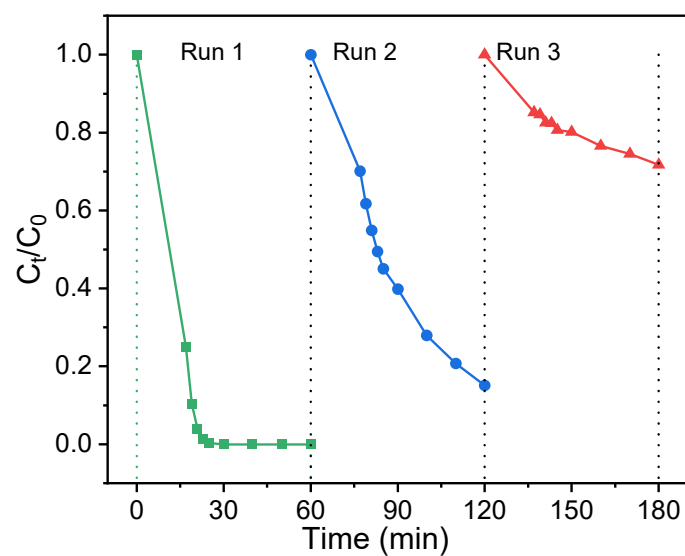

**Figure S3.** Cycling experiments for phenol degradation by the BC-24/PDS system ([phenol] = 0.2 mM, catalyst dosage = 0.1 g/L, [PDS] = 0.5 mM).

**Table S1.** The resistance parameters deduced from the equivalent circuits of EIS measurements.

| Electrodes | $R_s$ ( $\Omega$ ) | $R_{ct}$ ( $\Omega$ ) | $R_w$ ( $\Omega$ ) |
|------------|--------------------|-----------------------|--------------------|
| NC         | 1.31               | 5.93                  | 0.44               |
| AC         | 0.44               | 1.67                  | 0.44               |
| BC-12      | 0.56               | 1.10                  | 0.46               |
| BC-24      | 0.61               | 0.82                  | 0.46               |
| BC-48      | 0.66               | 1.61                  | 0.42               |

**Table S2.** Comparison of the capacitive performance of BC-24 in a three-electrode system with other biochar materials in the reported literature.

| Samples                            | Electrolyte                        | Current Density<br>(A/g) | Gravimetric Specific<br>Capacitance (F/g) | Ref.      |
|------------------------------------|------------------------------------|--------------------------|-------------------------------------------|-----------|
| BBC-4                              | 1 M H <sub>2</sub> SO <sub>4</sub> | 0.3                      | 259                                       | [1]       |
| PC-900                             | 1 M H <sub>2</sub> SO <sub>4</sub> | 0.5                      | 169.4                                     | [2]       |
| C_K/H <sub>3</sub> PO <sub>4</sub> | 1 M H <sub>2</sub> SO <sub>4</sub> | 0.5                      | 186.3                                     | [3]       |
| ACRP-650                           | 1 M H <sub>2</sub> SO <sub>4</sub> | 0.5                      | 289                                       | [4]       |
| HM-24                              | 1 M H <sub>2</sub> SO <sub>4</sub> | 0.5                      | 314                                       | [5]       |
| AA-RSC                             | 1 M H <sub>2</sub> SO <sub>4</sub> | 0.5                      | 332                                       | [6]       |
| BC-24                              | 1 M H <sub>2</sub> SO <sub>4</sub> | 0.5                      | 342                                       | This work |
| S-AC                               | 1 M KOH                            | 10                       | 85                                        | [7]       |
| AC <sub>TS</sub> -1.0              | 6 M KOH                            | 10                       | 150                                       | [8]       |
| GHPB-0.2                           | 6 M KOH                            | 10                       | 160                                       | [9]       |
| GHPB-0.2                           | 1 M H <sub>2</sub> SO <sub>4</sub> | 10                       | 118                                       | [9]       |
| ACRP-650                           | 1 M H <sub>2</sub> SO <sub>4</sub> | 10                       | 187                                       | [4]       |
| AA-RSC                             | 1 M H <sub>2</sub> SO <sub>4</sub> | 10                       | 190                                       | [6]       |
| BC-24                              | 1 M H <sub>2</sub> SO <sub>4</sub> | 10                       | 198                                       | This work |

**Table S3.** Comparison of the catalytic phenol degradation performance of BC-24 through persulfate activation with reported literature.

| Catalysts                  | Experimental Conditions                                  | Reaction Time (min) | Degradation Efficiency | $k$ (min <sup>-1</sup> ) | Stability                    | Ref.      |
|----------------------------|----------------------------------------------------------|---------------------|------------------------|--------------------------|------------------------------|-----------|
| AC950                      | [catalyst] = 0.2 g/L, [PS] = 5 mM, [phenol] = 0.5 mM     | 60                  | 99.5%                  | 0.087                    | Removal 10% after 3 cycles   | [10]      |
| Ca/BS-800-KOH              | [catalyst] = 0.066 g/L, [PS] = 1 g/L, [phenol] = 20 mg/L | 90                  | 100%                   | 0.040                    | Removal 48% after 3 cycles   | [11]      |
| GK-BC-850                  | [catalyst] = 0.5 g/L, [PS] = 1 mM, [phenol] = 10 mg/L    | 60                  | 90%                    | 0.155                    | Removal 50% after 5 cycles   | [12]      |
| BM- $\alpha$ -FeOOH/PBC700 | [catalyst] = 0.2 g/L, [PS] = 8.4 mM, [phenol] = 50 mg/L  | 180                 | 89.6%                  | 0.100                    | Removal 82.9% after 4 cycles | [13]      |
| BC                         | [catalyst] = 0.5 g/L, [PS] = 0.8 mM, [phenol] = 25 mg/L  | 240                 | 86.0%                  | 0.381                    | Removal 90% after 3 cycles   | [14]      |
| RGO                        | [catalyst] = 0.5 g/L, [PS] = 0.8 mM, [phenol] = 25 mg/L  | 240                 | 86.0%                  | 0.317                    | Removal 90% after 3 cycles   | [14]      |
| NCd-4-800                  | [catalyst] = 0.5 g/L, [PS] = 0.5 mM, [phenol] = 10 mg/L  | 30                  | 85%                    | — <sup>a</sup>           | Removal 62% after 3 cycles   | [15]      |
| N-BC900                    | [catalyst] = 0.2 g/L, [PS] = 2 mM, [phenol] = 20 mg/L    | 20                  | 100%                   | 0.206                    | Removal 45% after 5 cycles   | [16]      |
| Cu-GBC10C                  | [catalyst] = 0.3 g/L, [PS] = 2 mM, [phenol] = 0.1 mM     | 30                  | 90%                    | — <sup>a</sup>           | Removal 30.6% after 4 cycles | [17]      |
| BC-24                      | [catalyst] = 0.1 g/L, [PS] = 0.5 mM, [phenol] = 0.2 mM   | 25                  | 100%                   | 0.683                    | Removal 30% after 3 cycles   | This work |

<sup>a</sup> Not given.

## References

1. Qiu, Z.; Wang, Y.; Bi, X.; Zhou, T.; Zhou, J.; Zhao, J.; Miao, Z.; Yi, W.; Fu, P.; Zhuo, S., Biochar-based carbons with hierarchical micro-meso-macro porosity for high rate and long cycle life supercapacitors. *J. Power Sources* **2018**, *376*, 82-90.
2. Lin, G.; Wang, Q.; Yang, X.; Cai, Z.; Xiong, Y.; Huang, B., Preparation of phosphorus-doped porous carbon for high performance supercapacitors by one-step carbonization. *RSC Adv.* **2020**, *10*, 17768-17776.
3. Dat, N. T.; Tran, T. T. V.; Van, C. N.; Vo, D.-V. N.; Kongparakul, S.; Zhang, H.; Guan, G.; Samart, C., Carbon sequestration through hydrothermal carbonization of expired fresh milk and its application in supercapacitor. *Biomass Bioenerg.* **2020**, *143*, 105836.
4. Jiang, F.; Zhu, Y.; Liu, Z.; Zhang, X.; Ma, W.; Wu, H.; Huang, X.; Zhang, Q., Novel synthesis route for the preparation of mesoporous nitrogen-doped carbons from forestry wastes for supercapacitors. *Surf. Interfaces* **2021**, *24*, 101132.
5. Tang, D.; Luo, Y.; Lei, W.; Xiang, Q.; Ren, W.; Song, W.; Chen, K.; Sun, J., Hierarchical porous carbon materials derived from waste *Lentinus edodes* by a hybrid hydrothermal and molten salt process for supercapacitor applications. *Appl. Surf. Sci.* **2018**, *462*, 862-871.
6. Sudhan, N.; Subramani, K.; Karnan, M.; Ilayaraja, N.; Sathish, M., Biomass-Derived Activated Porous Carbon from Rice Straw for a High-Energy Symmetric Supercapacitor in Aqueous and Non-aqueous Electrolytes. *Energ. Fuel.* **2017**, *31*, 977-985.
7. Xia, C.; Surendran, S.; Ji, S.; Kim, D.; Chae, Y.; Kim, J.; Je, M.; Han, M.-K.; Choe, W.-S.; Choi, C. H.; Choi, H.; Kim, J. K.; Sim, U., A sulfur self-doped multifunctional biochar catalyst for overall water splitting and a supercapacitor from *Camellia japonica* flowers. *Carbon Energy* **2022**, *4*, 491-505.
8. Ma, Z.-W.; Liu, H.-Q.; Lü, Q.-F., Porous biochar derived from tea saponin for supercapacitor electrode: Effect of preparation technique. *J. Energy Storage* **2021**, *40*, 102773.
9. Yao, S.; Zhang, Z.; Wang, Y.; Liu, Z.; Li, Z., Simple one-pot strategy for converting biowaste into valuable graphitized hierarchically porous biochar for high-efficiency capacitive storage. *J. Energy Storage* **2021**, *44*, 103259.
10. Sun, C.; Chen, T.; Huang, Q.; Zhan, M.; Li, X.; Yan, J., Activation of persulfate by CO<sub>2</sub>-activated biochar for improved phenolic pollutant degradation: Performance and mechanism. *Chem. Eng. J.* **2020**, *380*, 122519.
11. Zhang, H.; Tang, L.; Wang, J.; Yu, J.; Feng, H.; Lu, Y.; Chen, Y.; Liu, Y.; Wang, J.; Xie, Q., Enhanced surface activation process of persulfate by modified bagasse biochar for degradation of phenol in water and soil: Active sites and electron transfer mechanism. *Colloids Surf. Physicochem. Eng. Aspects* **2020**, *599*, 124904.
12. Fan, X.; Yu, Y.; Dong, S.; Liu, Y.; Song, C.; Li, Q.; Wang, X., Heteroatoms-doped biochar derived from deciduous resource as persulfate catalysts for efficient degradation of phenol. *J. Water Process Eng.* **2022**, *48*, 102866.
13. Zhao, L.; Zhang, H.; Zhao, B.; Lyu, H., Activation of peroxydisulfate by ball-milled  $\alpha$ -FeOOH/biochar composite for phenol removal: Component contribution and internal mechanisms. *Environ. Pollut.* **2022**, *293*, 118596.
14. Wang, S.; Wang, J., Kinetics of PMS activation by graphene oxide and biochar. *Chemosphere* **2020**, *239*, 124812.
15. Xu, L.; Wu, C.; Liu, P.; Bai, X.; Du, X.; Jin, P.; Yang, L.; Jin, X.; Shi, X.; Wang, Y., Peroxymonosulfate activation by nitrogen-doped biochar from sawdust for the efficient degradation of organic pollutants. *Chem. Eng. J.* **2020**, *387*, 124065.
16. Zhu, S.; Huang, X.; Ma, F.; Wang, L.; Duan, X.; Wang, S., Catalytic Removal of Aqueous Contaminants on N-Doped Graphitic Biochars: Inherent Roles of Adsorption and Nonradical Mechanisms. *Environ. Sci. Technol.* **2018**, *52*, 8649-8658.
17. Wan, Z.; Sun, Y.; Tsang, D. C. W.; Yu, I. K. M.; Fan, J.; Clark, J. H.; Zhou, Y.; Cao, X.; Gao, B.; Ok, Y. S., A sustainable biochar catalyst synergized with copper heteroatoms and CO<sub>2</sub> for singlet oxygenation and electron transfer routes. *Green Chem.* **2019**, *21*, 4800-4814.
